# Supplementary material
Source: PubMed Central journal article supplement (PMC6214382)
Supplement: NIHMS1506712-supplement-Graphic_Abstract.pdf [file NIHMS1506712-supplement-Graphic_Abstract.pdf]

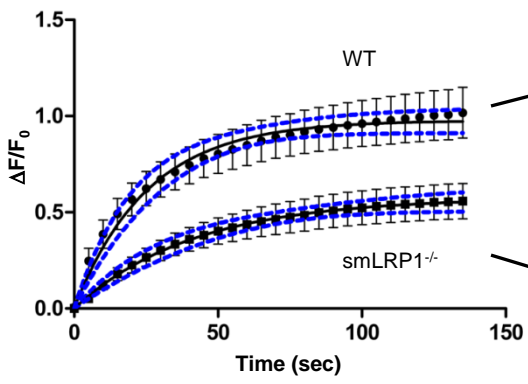

Rate of Ca<sup>2+</sup> Release

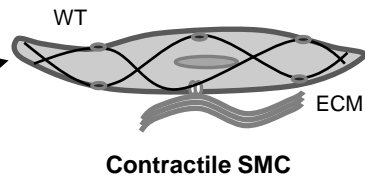

Contractile SMC

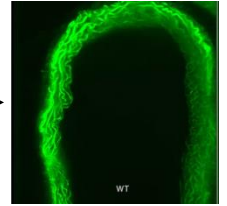

Functional Vasculature

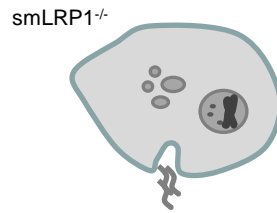

Synthetic SMC

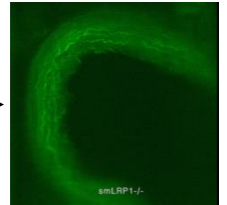

Dysfunctional Vasculature
